# Supplementary material for: Electrospun Polyaniline-Based Composite Nanofibers: Tuning the Electrical Conductivity by Tailoring the Structure of Thiol-Protected Metal Nanoparticles
Source: Hindawi journal article supplement (doi:10.1155/2017/6142140), 2017-01-01
Supplement: f1 [file 6142140.f1.docx]

[Supporting Information]

Electrospun polyaniline-based composite nanofibers: tuning the electrical conductivity by tailoring the structure of thiol-protected metal nanoparticles

Filippo Pierini1*, Massimiliano Lanzi2, Paweł Nakielski1, and Tomasz Aleksander Kowalewski1

1Department of Biosystems and Soft Matter, Institute of Fundamental Technological Research,

Polish Academy of Sciences, ul. Pawinskiego 5B, 02-106 Warsaw, Poland

2Department of Industrial Chemistry “Toso Montanari”, Alma Mater Studiorum, University of

Bologna, Viale Risorgimento 4, 40136 Bologna, Italy

Corresponding Author: *E-mail: fpierini@ippt.pan.pl

**1. Synthesis of Thiol-Capped Metal Nanoparticles**

The entire synthesis was performed in a nitrogen atmosphere to prevent oxidation of the metal. 0.5 mmol of starting metal salts were dissolved in 20 mL of water and then 10 ml of an aqueous solution of KBr (100 mM - 119 mg - 1.0 mmol) was added. The mixture was stirred vigorously for 10 minutes and subsequently, 20 ml of a solution of TOABr (50 mM - 548 mg - 1.0 mmol) in toluene was added in order to keep the metal:TOABr molar ratio of 1:2. The tetraoctylammonium-metal complex resulting from this reaction moved into the organic phase, where the reduction took place. 30 ml of a solution containing 1 mmol (33.3 mM) of capping agent (molar ratio of metal and capping molecule was 1:2) was subsequently added and the mixture was stirred vigorously for 5 minutes. 15 ml of a 333.3 mM NaBH4 (192 mg - 5 mmol) water solution was dripped into the mixture and, at this stage, the suspension colour turned black. The suspension was stirred vigorously for 2 hours. The aqueous phase was removed from the flask containing the capped nanoparticles dispersed in the organic phase. The toluene suspension was washed 4 times with water to eliminate impurities, then dried with sodium sulfate, filtered and further dried using a rotary evaporator. The product (a dark oil), was dripped into 80 ml of previously cooled methanol. The suspension was washed 3 times with methanol and then lyophilized to obtain the final material. Part of the nanoparticle sample was then suspended in dichloromethane.

4-methylbenzenethiol-capped gold nanoparticles (Au-MBT), 4-methylbenzenethiol-capped gold-silver alloy nanoparticles with 4:1 gold-silver molar ratio (Au4Ag1-MBT), 4-methylbenzenethiol-capped gold-silver alloy nanoparticles with 1:4 gold-silver molar ratio (Au1Ag4-MBT), 4-methylbenzenethiol-capped silver nanoparticles (Ag-MBT), and 1-butanethiol-capped silver nanoparticles (Ag-BuT) were prepared according to the described synthetic method using the starting metal salt solutions and the capping agent solutions described in Table S1.

TABLE S1: Composition of the metal salt and capping molecule solutions used during the nanoparticle synthesis.

| **Nanoparticles** | **Starting metal salt** | **Capping agent** |
| --- | --- | --- |
| Au-MBT | 0.5 mmol of HAuCl4 | 1 mmol of MBT |
| Au4Ag1-MBT | 0.4 mmol of HAuCl4 + 0.1 mmol of AgNO3 | 1 mmol of MBT |
| Au1Ag4-MBT | 0.1 mmol of HAuCl4 + 0.4 mmol of AgNO3 | 1 mmol of MBT |
| Ag-MBT | 0.5 mmol of AgNO3 | 1 mmol of MBT |
| Ag-BuT | 0.5 mmol of AgNO3 | 1 mmol of BuT |

**2. Nanoparticle Characterization**

TABLE S2: Main ATR-FTIR absorption bands and signal assignments for Ag-BuT and Ag-MBT (ν: stretching; γ: bending).

| **Assignments** | **Ag-BuT (cm-1)** | **Ag-MBT (cm-1)** |
| --- | --- | --- |
| ν =CH (aromatic group) | - | 3015 |
| ν -CH3 (alkyl group) | 2956 | 2850 - 3000 |
| ν asymmetric -CH2 (alkyl group) | 2932 | - |
| ν symmetric -CH2 (alkyl group) | 2685 | - |
| ν C-C=C (aromatic group) | - | 1400 - 1650 |
| γ -CH2 (alkyl group) | 1460 | - |
| γ in-plane =CH (aromatic group) | - | 1000 - 1200 |
| γ out-of-plane =CH (aromatic group) | - | 801 |
